# Supplementary material for: Enhanced dispersion stability of gold nanoparticles by the physisorption of cyclic poly(ethylene glycol)
Source: PubMed Central journal article supplement (PMC7705015; doi:10.1038/s41467-020-19947-8), 2020-11-30
Supplement: 41467_2020_19947_MOESM1_ESM.pdf [file 41467_2020_19947_MOESM1_ESM.pdf]

## **Supplementary information**

### **Enhanced dispersion stability of gold nanoparticles by the physisorption of cyclic poly(ethylene glycol)**

Yubo Wang<sup>1</sup>, Jose Enrico Q. Quinsaat<sup>2</sup>, Tomoko Ono<sup>2</sup>, Masatoshi Maeki<sup>2</sup>, Manabu Tokeshi<sup>2</sup>, Takuya Isono<sup>2</sup>, Kenji Tajima<sup>2</sup>, Toshifumi Satoh<sup>2</sup>, Shin-ichiro Sato<sup>2</sup>, Yutaka Miura<sup>3,4</sup>, and Takuya Yamamoto<sup>2\*</sup>

<sup>1</sup>Graduate School of Chemical Sciences and Engineering, Hokkaido University, Sapporo, Hokkaido 060–8628, Japan.

<sup>2</sup>Division of Applied Chemistry, Faculty of Engineering, Hokkaido University, Sapporo, Hokkaido 060–8628, Japan.

<sup>3</sup>Department of Bioengineering, Graduate School of Engineering, The University of Tokyo, 7–3–1 Hongo, Bunkyo-ku, Tokyo 113–8656, Japan.

<sup>4</sup>Laboratory for Chemistry and Life Science, Institute of Innovative Research, Tokyo Institute of Technology, 4259 Nagatsutacho, Midori-ku, Yokohama, Kanagawa, 226–8503, Japan.

**a. AuNPs/HS-PEG-OMe**

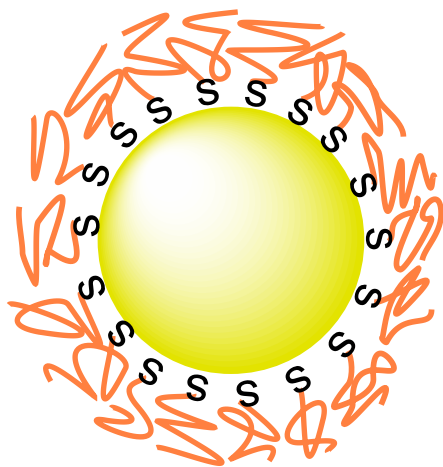

HS  : HS-PEG-OMe

**b. AuNPs/c-PEG**

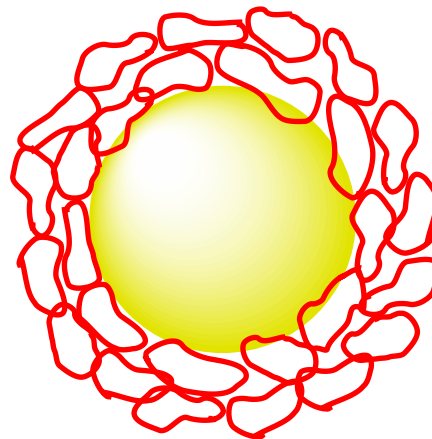

 : c-PEG

**Supplementary Fig. 1 Schematic illustrations of PEGylated AuNPs. a AuNPs/HS-PEG-OMe and b AuNPs/c-PEG.**

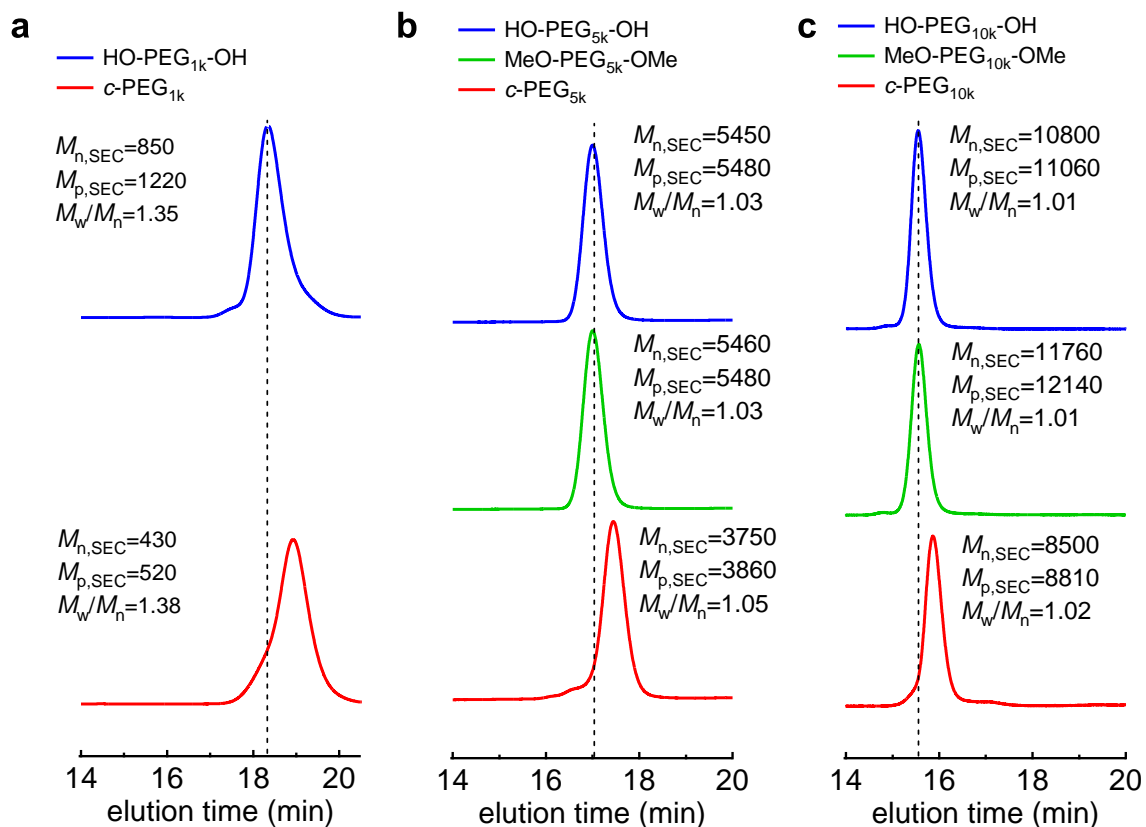

**Supplementary Fig. 2 SEC traces of HO-PEG-OH (blue), MeO-PEG-OMe (green), and c-PEG (red). The molecular weight was a 1, b 5, and c 10 kDa.**

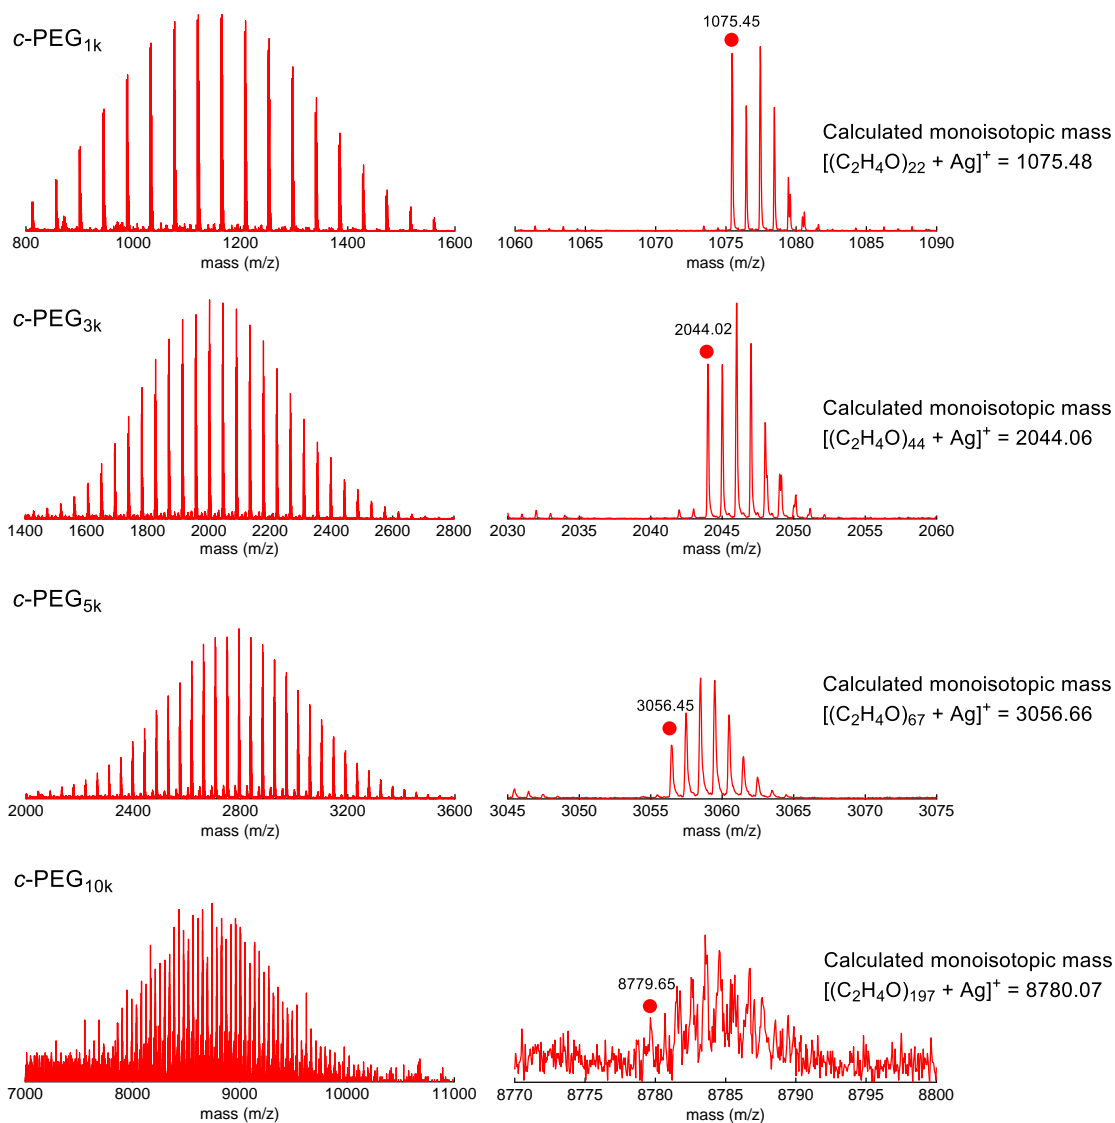

**Supplementary Fig. 3 MALDI-TOF mass spectra of c-PEG<sub>1k</sub>, c-PEG<sub>3k</sub>, c-PEG<sub>5k</sub>, and c-PEG<sub>10k</sub>.** Calculated monoisotopic mass and experimental *m/z* values of typical peaks are shown.

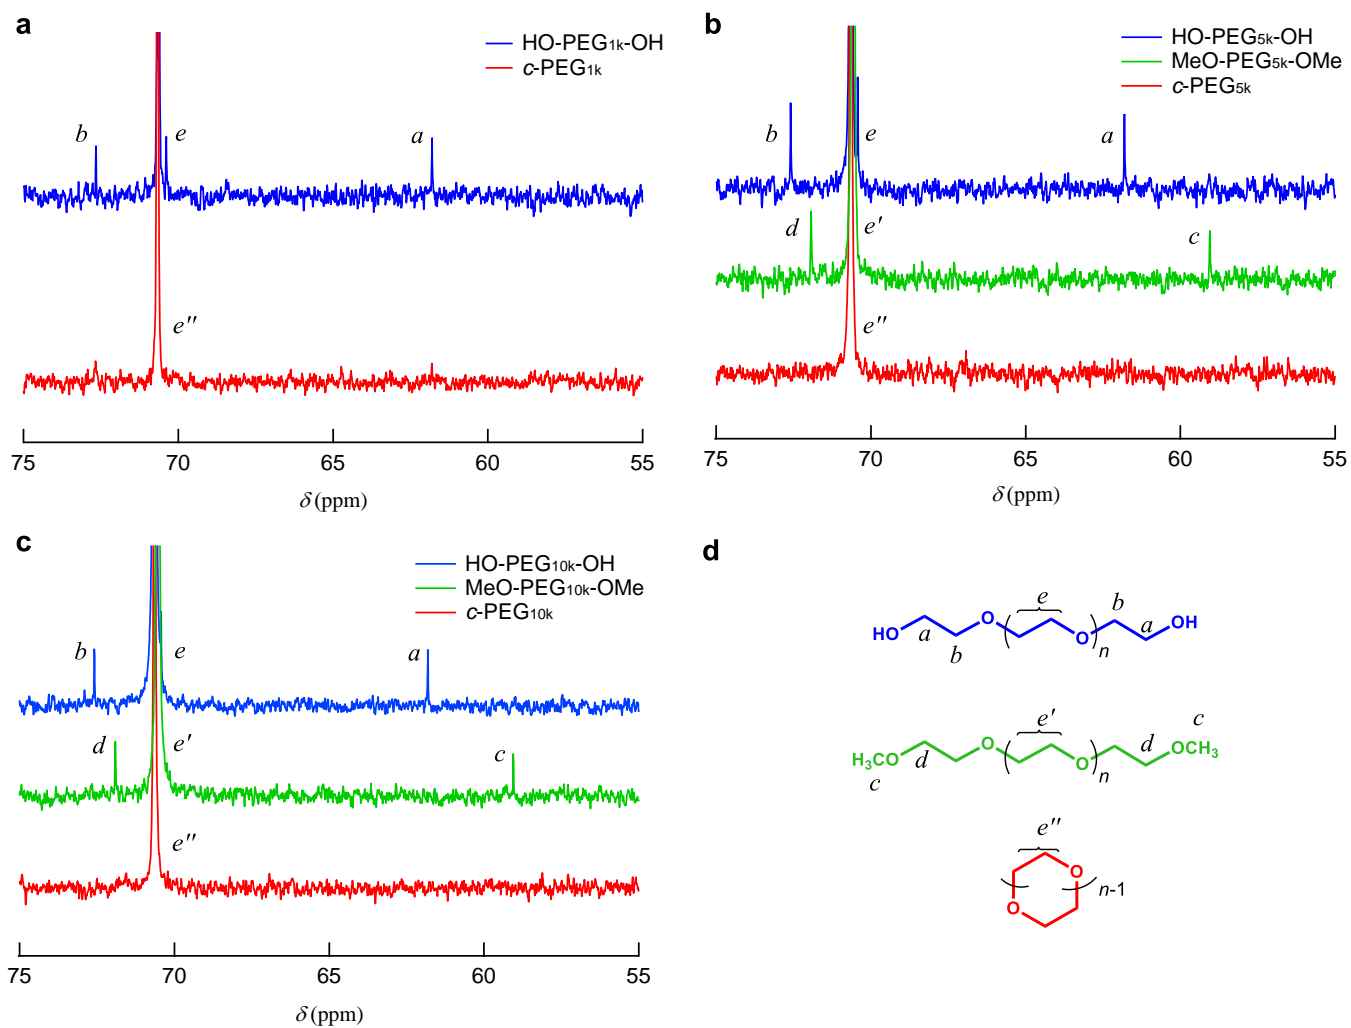

**Supplementary Fig. 4** <sup>13</sup>C NMR spectra and chemical structures of HO-PEG-OH (blue), MeO-PEG-OMe (green), and c-PEG (red). The molecular weight was **a** 1, **b** 5, and **c** 10 kDa. The assigned peaks correspond to the chemical structures in **d**.

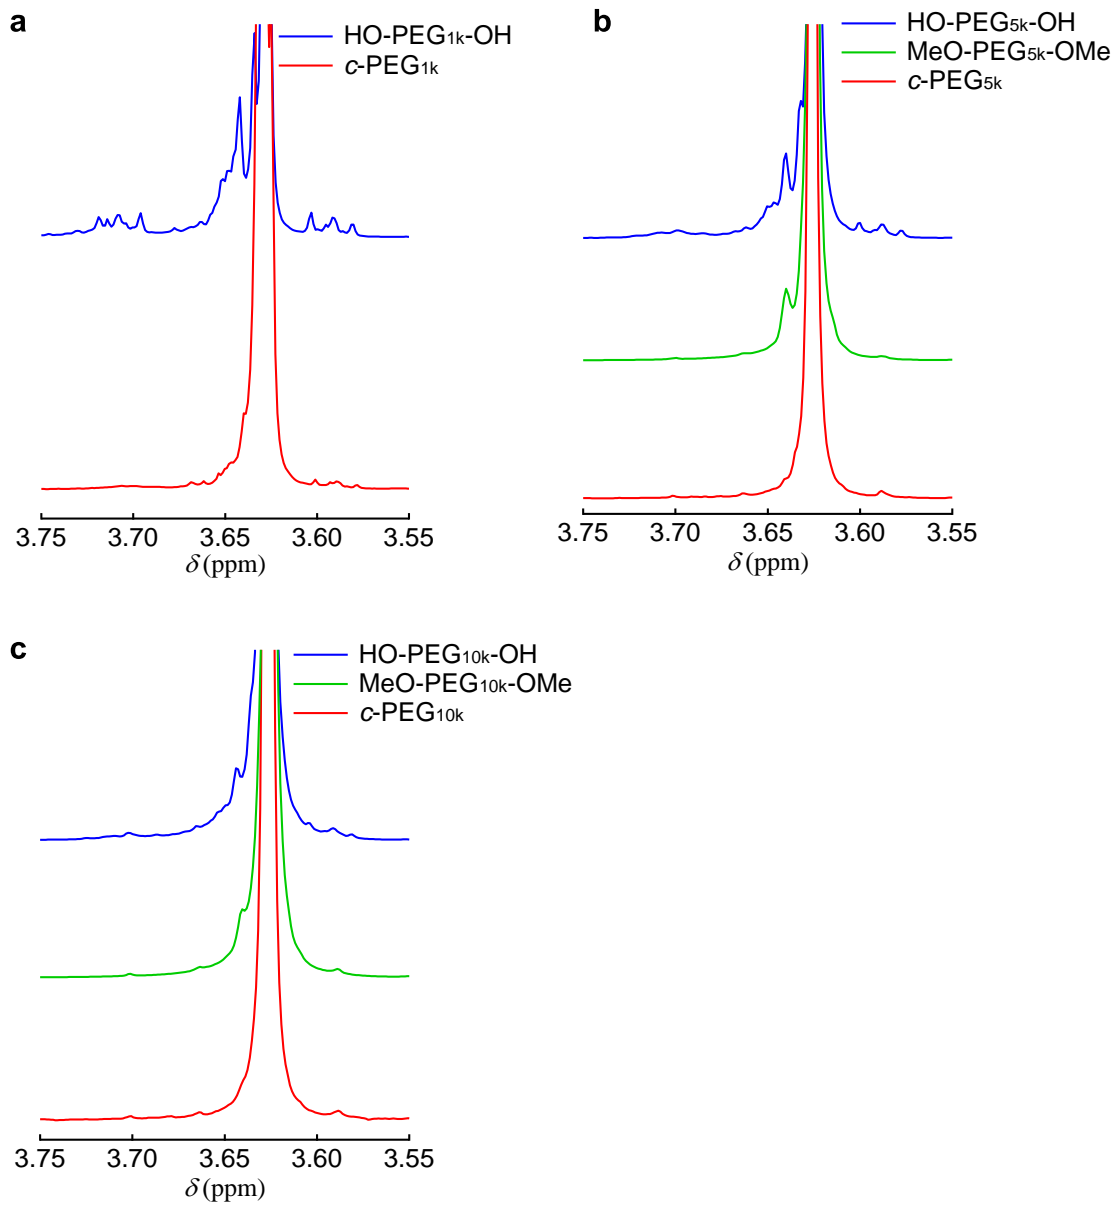

**Supplementary Fig. 5** <sup>1</sup>H NMR spectra of HO-PEG-OH (blue), MeO-PEG-OMe (green), and c-PEG (red). The molecular weight was a 1, b 5, and c 10 kDa.

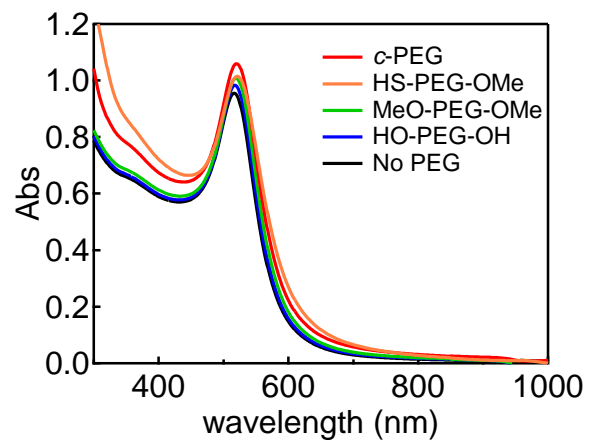

**Supplementary Fig. 6 UV-Vis spectra before freezing and lyophilization.** AuNPs<sub>15</sub>/No PEG (black), AuNPs<sub>15</sub>/HO-PEG<sub>3k</sub>-OH (blue), AuNPs<sub>15</sub>/MeO-PEG<sub>3k</sub>-OMe (green), AuNPs<sub>15</sub>/HS-PEG<sub>3k</sub>-OMe (orange), and AuNPs<sub>15</sub>/c-PEG<sub>3k</sub> (red).

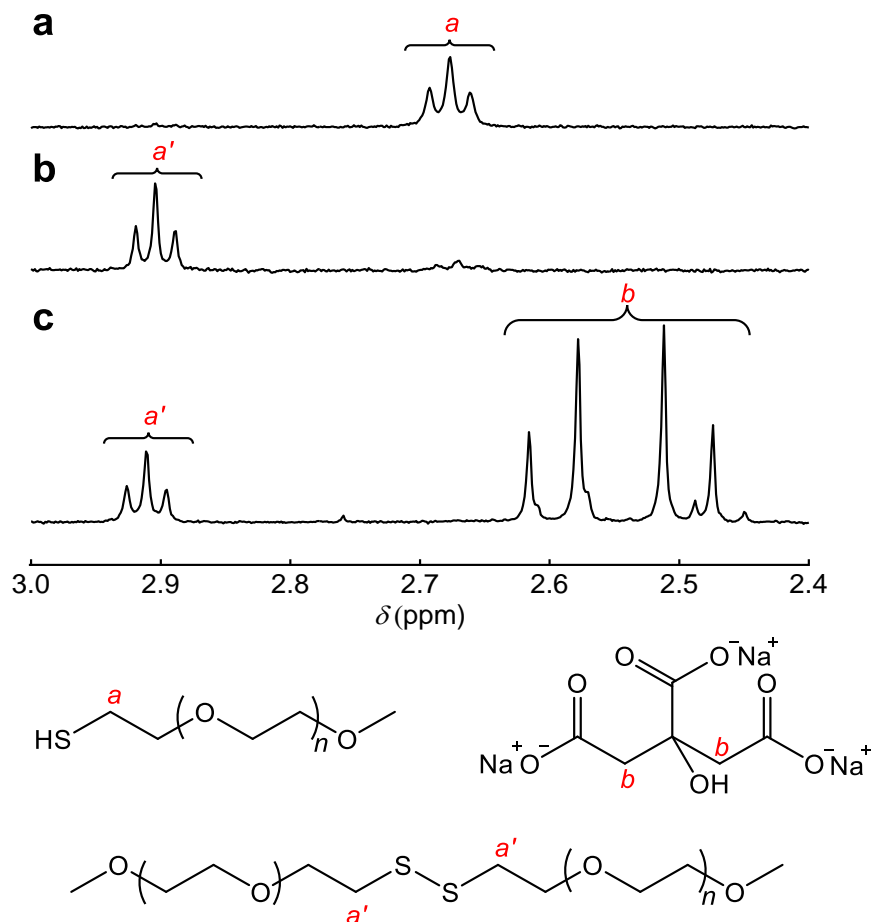

**Supplementary Fig. 7 Formation of disulfide by heating.**  $^1\text{H}$  NMR spectra of **a** HS-PEG<sub>3k</sub>-OMe, **b** MeO-PEG<sub>3k</sub>-S-S-PEG<sub>3k</sub>-OMe, and **c** AuNPs<sub>15</sub>/HS-PEG<sub>3k</sub>-OMe after heating at 85 °C for 4 h followed by exchange of the solvent to D<sub>2</sub>O.



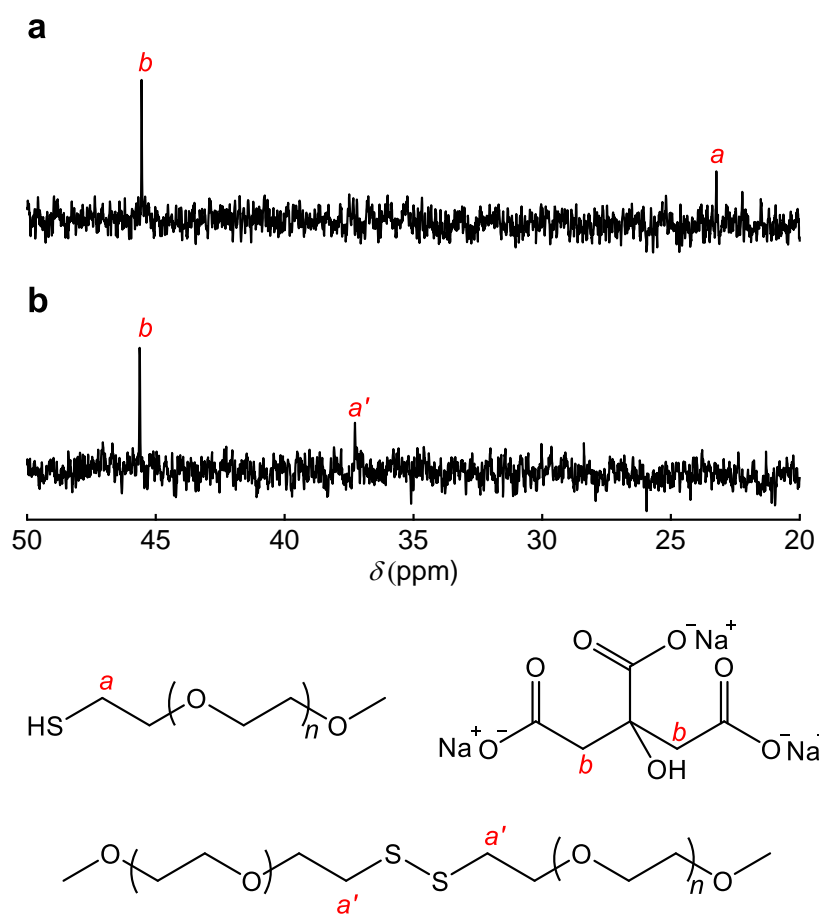

**Supplementary Fig. 8 Formation of disulfide by heating.**  $^{13}\text{C}$  NMR spectra of AuNPs<sub>15</sub>/HS-PEG<sub>3k</sub>-OMe **a** before and **b** after heating at 85 °C for 4 h.

## a. Before Heating

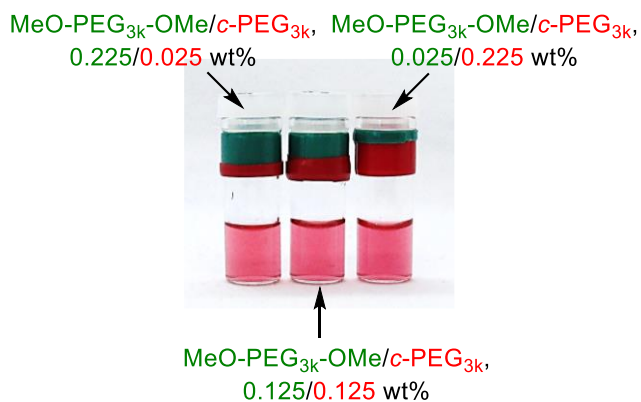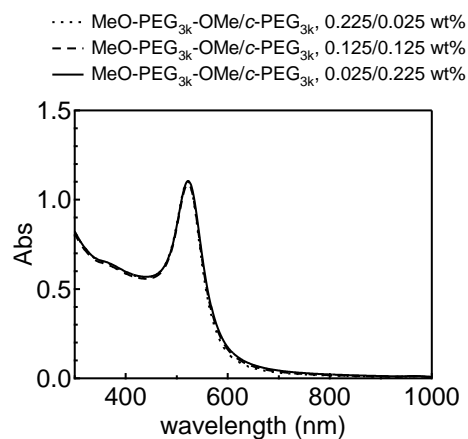

## b. After Heating for 4 h

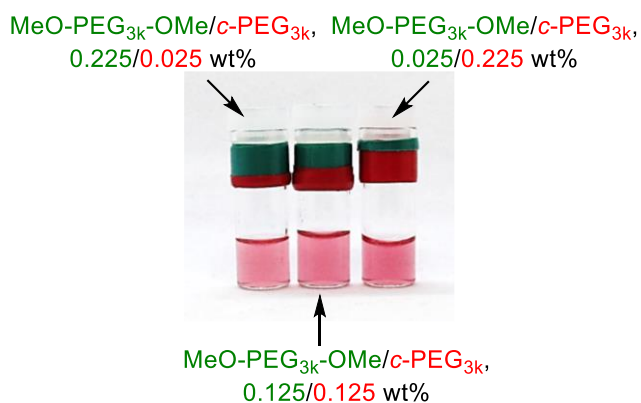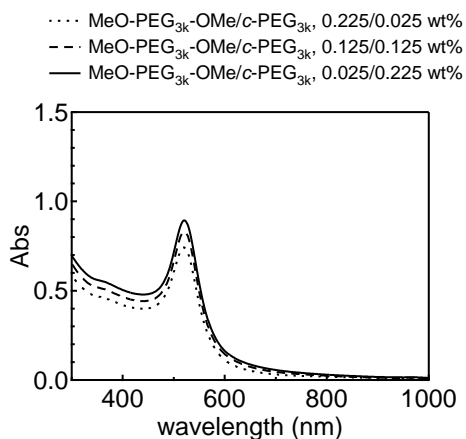

**Supplementary Fig. 9 Heating test.** Photographs and UV-Vis spectra of AuNPs<sub>30</sub>/MeO-PEG<sub>3k</sub>-OMe/*c*-PEG<sub>3k</sub>. **a** Before heating and **b** after heating for 4 h at 85 °C. From left to right in each photograph, the concentrations of MeO-PEG<sub>3k</sub>-OMe/*c*-PEG<sub>3k</sub> were 0.225/0.025, 0.125/0.125, and 0.025/0.225 wt%. Rel. Abs was 67, 76, or 81%, respectively.

### a. Before Heating

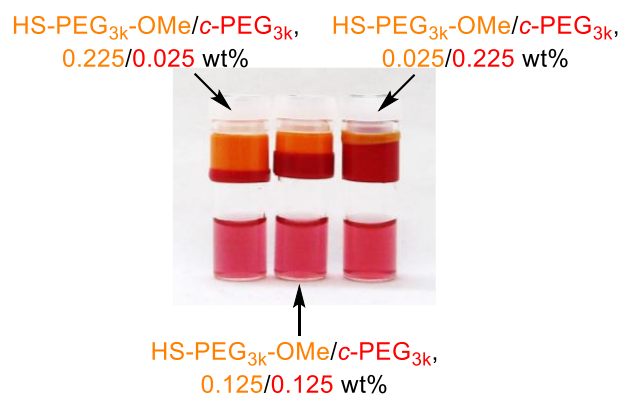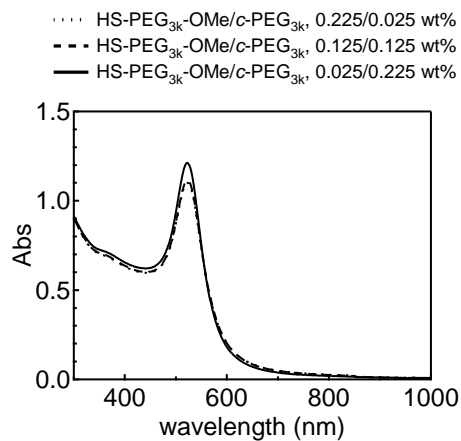

### b. After Heating for 4 h

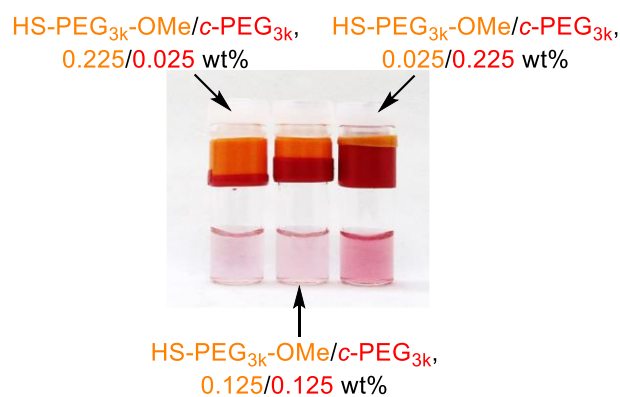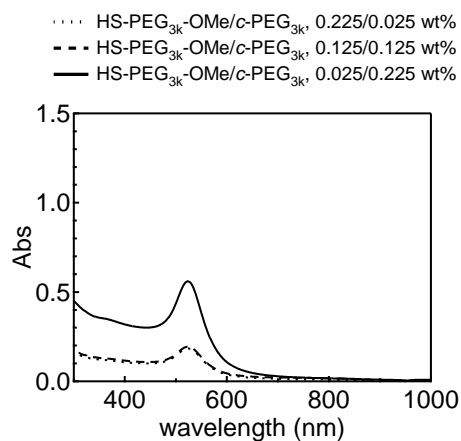

**Supplementary Fig. 10 Heating test.** Photographs and UV-Vis spectra of AuNPs<sub>30</sub>/HS-PEG<sub>3k</sub>-OMe/c-PEG<sub>3k</sub>. **a** Before heating and **b** after heating for 4 h at 85 °C. From left to right in each photograph, the concentrations of HS-PEG<sub>3k</sub>-OMe/c-PEG<sub>3k</sub> were 0.225/0.025, 0.125/0.125, and 0.025/0.225 wt%. Rel. Abs was 17, 17, or 46%, respectively.

**a. Immediately After Adding PBS**

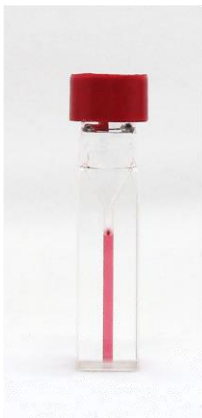

**b. 7 d After Adding PBS**

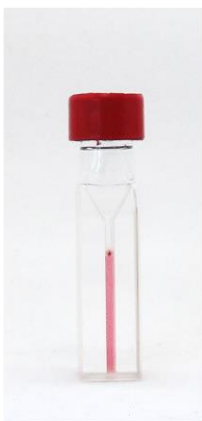

**c. 14 d After Adding PBS**

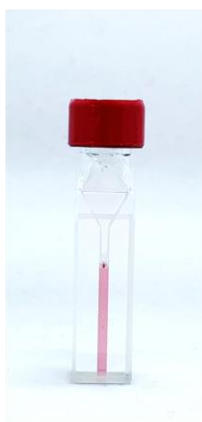

**Supplementary Fig. 11 Photographs of AuNPs<sub>15</sub>/c-PEG<sub>3k</sub> in a long-term stability test. a** Immediately after, **b** 7 d after, and **c** 14 d after the addition of a tenfold-concentrated PBS solution kept at 37 °C.

**a. Before Adding PBS**

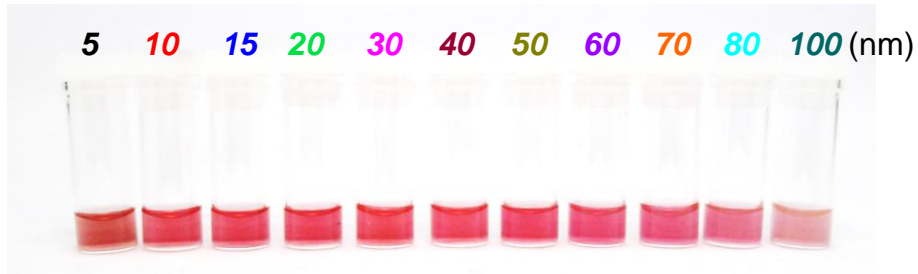

**b. Immediately After Adding PBS**

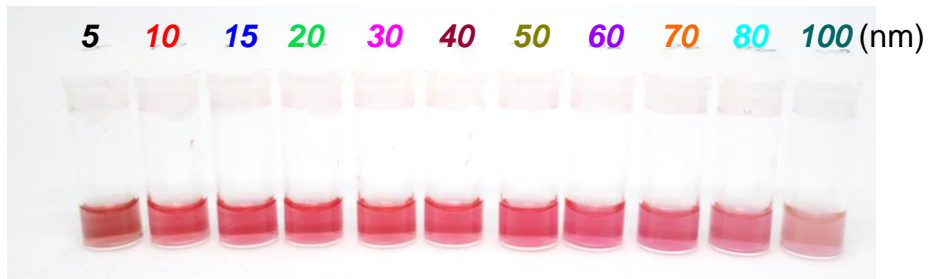

**c. 850 min After Adding PBS**

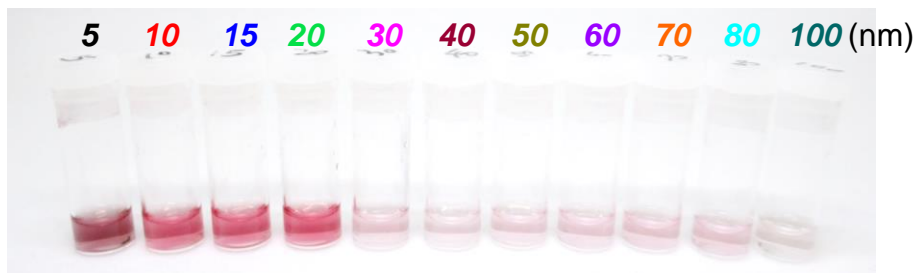

**Supplementary Fig. 12 Physiological condition test with various diameters of AuNPs (5–100 nm).** Photographs of AuNPs/*c*-PEG<sub>3k</sub> **a** before, **b** immediately after, and **c** 850 min after the addition of a tenfold-concentrated PBS solution. The resulting dispersions were pH 7.4 and 150 mM of NaCl. From left to right in each photograph, AuNPs<sub>5</sub>/*c*-PEG<sub>3k</sub>, AuNPs<sub>10</sub>/*c*-PEG<sub>3k</sub>, AuNPs<sub>15</sub>/*c*-PEG<sub>3k</sub>, AuNPs<sub>20</sub>/*c*-PEG<sub>3k</sub>, AuNPs<sub>30</sub>/*c*-PEG<sub>3k</sub>, AuNPs<sub>40</sub>/*c*-PEG<sub>3k</sub>, AuNPs<sub>50</sub>/*c*-PEG<sub>3k</sub>, AuNPs<sub>60</sub>/*c*-PEG<sub>3k</sub>, AuNPs<sub>70</sub>/*c*-PEG<sub>3k</sub>, AuNPs<sub>80</sub>/*c*-PEG<sub>3k</sub>, and AuNPs<sub>100</sub>/*c*-PEG<sub>3k</sub>.

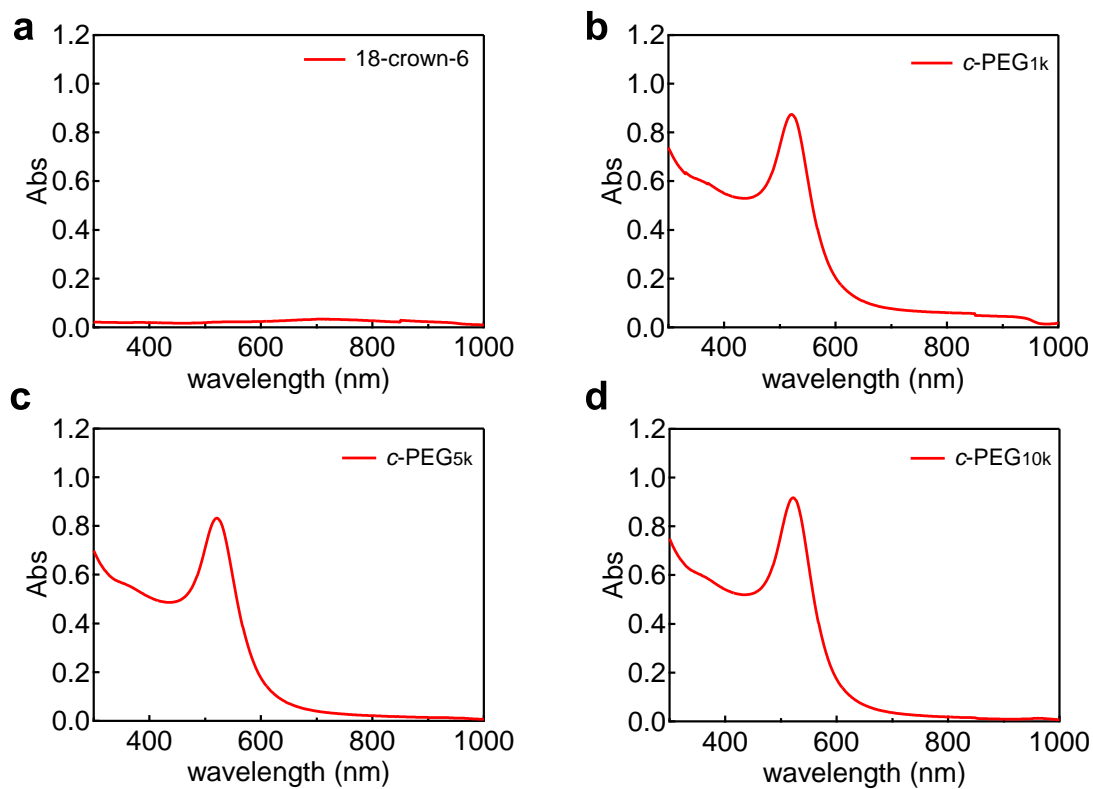

**Supplementary Fig. 13 Physiological condition test of AuNPs/18-crown-6 and AuNPs/c-PEG with various sizes.** UV-Vis spectra of **a** AuNPs<sub>15</sub>/18-crown-6, **b** AuNPs<sub>15</sub>/c-PEG<sub>1k</sub>, **c** AuNPs<sub>15</sub>/c-PEG<sub>5k</sub>, and **d** AuNPs<sub>15</sub>/c-PEG<sub>10k</sub> 1000 min after the addition of a tenfold-concentrated PBS solution. The resulting dispersions were pH 7.4 and 150 mM of NaCl.

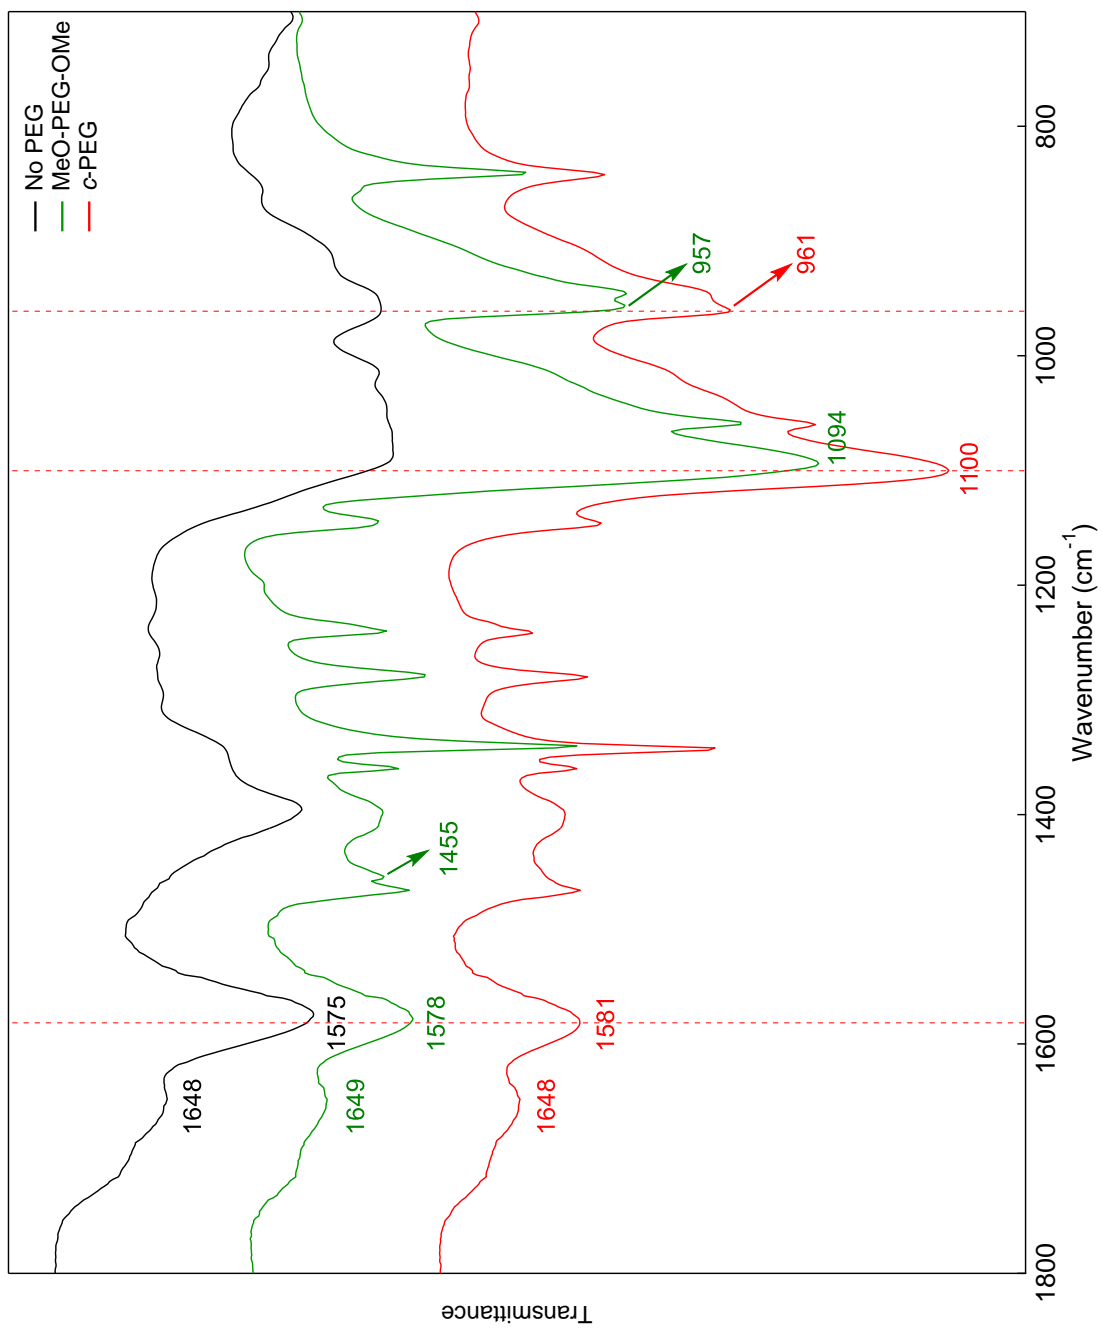

**Supplementary Fig. 14** FT-IR spectra of AuNPs<sub>15</sub>/No PEG (black), AuNPs<sub>15</sub>/MeO-PEG<sub>3k</sub>-OMe (green), and AuNPs<sub>15</sub>/c-PEG<sub>3k</sub> (red). Red dotted lines indicate the peak top wavenumbers of AuNPs<sub>15</sub>/c-PEG<sub>3k</sub>.

**Supplementary Table 1 Experimental and calculated  $m/z$  values for the monoisotopic mass of c-PEG<sub>3k</sub>.**

| DP <sub>n</sub> | Experimental | Calculated |
|-----------------|--------------|------------|
| 33              | 1559.73      | 1559.77    |
| 34              | 1603.76      | 1603.80    |
| 35              | 1647.80      | 1647.82    |
| 36              | 1691.81      | 1691.85    |
| 37              | 1735.83      | 1735.86    |
| 38              | 1779.86      | 1779.90    |
| 39              | 1823.89      | 1823.93    |
| 40              | 1867.90      | 1867.95    |
| 41              | 1911.94      | 1911.98    |
| 42              | 1955.96      | 1956.01    |
| 43              | 1999.98      | 2000.03    |
| 44              | 2044.02      | 2044.06    |
| 45              | 2088.03      | 2088.08    |
| 46              | 2132.06      | 2132.11    |
| 47              | 2176.07      | 2176.14    |
| 48              | 2220.10      | 2220.16    |
| 49              | 2264.13      | 2264.19    |
| 50              | 2308.16      | 2308.22    |
| 51              | 2352.17      | 2352.24    |
| 52              | 2396.20      | 2396.27    |
| 53              | 2440.22      | 2440.29    |
| 54              | 2484.25      | 2484.32    |
| 55              | 2528.27      | 2528.35    |



**Supplementary Table 2 DLS size, c-PEG layer thickness, and grafting density ( $\sigma$ ) of AuNPs<sub>15</sub>/c-PEG<sub>3k</sub> at various concentrations of c-PEG<sub>3k</sub>.**

| c-PEG conc.<br>(wt%)               | 0.05  | 0.15  | 0.25 | 0.50 | 0.75 |
|------------------------------------|-------|-------|------|------|------|
| DLS size (nm)                      | 20.3  | 25.0  | 27.4 | 27.1 | 28.7 |
| c-PEG layer<br>thickness (nm)      | 1.0   | 3.3   | 4.6  | 4.4  | 5.2  |
| $\sigma$ (chains/nm <sup>2</sup> ) | 0.029 | 0.094 | 0.13 | 0.12 | 0.15 |

**Supplementary Table 3 Estimated numbers of Au atoms and PEG molecules per one AuNP in the case of a PEG concentration of 0.25 wt%.**

| AuNPs size (nm) | Number of Au atoms per one AuNP ( $10^4$ ) | Number of PEG ( $M_n = 3,000$ Da) per one AuNPs ( $10^4$ ) |
|-----------------|--------------------------------------------|------------------------------------------------------------|
| 5               | 0.39                                       | 1.41                                                       |
| 10              | 3.10                                       | 11.3                                                       |
| 15              | 10.5                                       | 38.2                                                       |
| 20              | 24.8                                       | 90.4                                                       |
| 30              | 83.3                                       | 303                                                        |
| 40              | 198                                        | 723                                                        |
| 50              | 386                                        | 1410                                                       |
| 60              | 665                                        | 2430                                                       |
| 70              | 1070                                       | 3880                                                       |
| 80              | 1580                                       | 5780                                                       |
| 100             | 3090                                       | 11300                                                      |

**Supplementary Table 4 Absorption wavenumbers in the FT-IR spectra of AuNPs<sub>15</sub>/No PEG, AuNPs<sub>15</sub>/MeO-PEG<sub>3k</sub>-OMe, and AuNPs<sub>15</sub>/c-PEG<sub>3k</sub>.**

|                                                                               | AuNPs/No PEG<br>(cm <sup>-1</sup> ) | AuNPs/MeO-PEG-OMe<br>(cm <sup>-1</sup> ) | AuNPs/c-PEG<br>(cm <sup>-1</sup> ) |
|-------------------------------------------------------------------------------|-------------------------------------|------------------------------------------|------------------------------------|
| C-O, C-C stretching, CH <sub>2</sub> rocking of PEG <sup>1</sup>              | -                                   | 841                                      | 842                                |
| CH <sub>2</sub> rocking, CH <sub>2</sub> twisting of PEG <sup>1</sup>         | -                                   | 946                                      | 946                                |
| <b>CH<sub>2</sub> rocking, CH<sub>2</sub> twisting of PEG<sup>1</sup></b>     | -                                   | <b>957</b>                               | <b>961</b>                         |
| C-O, C-C stretching, CH <sub>2</sub> rocking of PEG <sup>1</sup>              | -                                   | 1059                                     | 1060                               |
| <b>C-O, C-C stretching of PEG<sup>1</sup></b>                                 | -                                   | <b>1094</b>                              | <b>1100</b>                        |
| C-O stretching, CH <sub>2</sub> rocking of PEG <sup>1</sup>                   | -                                   | 1145                                     | 1146                               |
| CH <sub>2</sub> twisting of PEG <sup>1</sup>                                  | -                                   | 1240                                     | 1242                               |
| CH <sub>2</sub> twisting of PEG <sup>1</sup>                                  | -                                   | 1279                                     | 1280                               |
| CH <sub>2</sub> wagging of PEG <sup>1</sup>                                   | -                                   | 1340                                     | 1343                               |
| Symmetric stretching of COO <sup>-</sup> of sodium citrate <sup>2</sup>       | 1396                                | 1398                                     | 1399                               |
| <b>CH<sub>2</sub> scissoring of PEG<sup>1</sup></b>                           | -                                   | <b>1455</b>                              | -                                  |
| CH <sub>2</sub> scissoring of PEG <sup>1</sup>                                | -                                   | 1466                                     | 1466                               |
| <b>Asymmetric stretching of COO<sup>-</sup> of sodium citrate<sup>2</sup></b> | <b>1575</b>                         | <b>1578</b>                              | <b>1581</b>                        |
| Asymmetric stretching of COO <sup>-</sup> of Au-citrate <sup>2</sup>          | 1648                                | 1649                                     | 1648                               |

Noticeable differences are shown in bold.

## Supplementary references

1. Vrandečić, N.S., Erceg, M., Jakić, M. & Klarić, I. Kinetic analysis of thermal degradation of poly(ethylene glycol) and poly(ethylene oxide)s of different molecular weight. *Thermochim. Acta* **498**, 71-80 (2010).
2. Wulandari, P. et al. Characterization of citrates on gold and silver nanoparticles. *J. Colloid Interface Sci.* **438**, 244-248 (2015).
